# Supplementary material for: 梁柱式轻钢结构体系在低层独立式住宅（别墅）中的应用
Source: Frontiers journal article supplement (doi:10.3389/fgene.2024.1382421), 2003-01-01
Supplement: Table_1.pdf [file Table_1.pdf]

Supplementary table 1. characteristics of patients with squamous carcinoma of lung in CZHR cohorts

| Characteristics |           | KEAP1 wt(n=448) | KEAP1 mt(n=50) | Overall(n=498) |
|-----------------|-----------|-----------------|----------------|----------------|
| Age (%)         |           | 67.36           | 66.12          | 67.24          |
|                 | >=60      | 360(80.4%)      | 39(78%)        | 399(80.1%)     |
|                 | <60       | 79(17.6%)       | 10(20%)        | 90(18.1%)      |
|                 | NA        | 8(1.8%)         | 1(2%)          | 9(1.8%)        |
| Sex (%)         | Female    | 105(23.4%)      | 12(24%)        | 129(25.9%)     |
|                 | Male      | 332 (74.1%)     | 38(76%)        | 369(74.1%)     |
| Smoking index   |           | 52.13           | 54.5           | 52.36          |
|                 | NA        | 67              | 9              | 76             |
| Stage (%)       |           |                 |                |                |
|                 | NA        | 4 (0.9%)        | 0              | 4 (0.8%)       |
|                 | Stage I   | 3 (0.7%)        | 0              | 3 (0.6%)       |
|                 | Stage IA  | 81 (18.1%)      | 7 (14%)        | 88 17.7%)      |
|                 | Stage IB  | 133 (29.7%)     | 18 (36%)       | 151 (30.3%)    |
|                 | Stage II  | 3 (0.7%)        | 0              | 3(0.6%)        |
|                 | Stage IIA | 59 (13.2%)      | 5 (10%)        | 64 (12.9%)     |
|                 | Stage IIB | 85 (19%)        | 9 (18%)        | 94 (18.9%)     |
|                 | Stage III | 74 (16.5%)      | 10 (20%)       | 84 (16.9%)     |
|                 | Stage IV  | 6 (1.3%)        | 1 (2%)         | 7 (1.4%)       |

Supplementary table2. Types of mutants of LUADs with KEAP1 mutation in CZHR cohorts.

| Patients   | Gene  | Types of mutants | PFS (days) | Neutrophil score |
|------------|-------|------------------|------------|------------------|
| Patient 1  | KEAP1 | P. R442N         | 360        | 1%               |
| Patient 2  | KEAP1 | P. E242K         | 338        | 4%               |
| Patient 3  | KEAP1 | P. A40E          | 120        | 5%               |
| Patient 4  | KEAP1 | P. G417V         | 300        | 3%               |
| Patient 5  | KEAP1 | P. M161I         | 73         | 10%              |
| Patient 6  | KEAP1 | P. A191V         | 0          | 12%              |
| Patient 7  | KEAP1 | P. D422N         | 0          | 13%              |
| Patient 8  | KEAP1 | P. E244K         | 0          | 15%              |
| Patient 9  | KEAP1 | P. G378D         | 0          | 25%              |
| Patient 10 | KEAP1 | P. E307K         | 0          | 10%              |
